# Supplementary material
Source: publisher figshare collection journal article supplement (https://acs.figshare.com/ndownloader/files/25178896)
Supplement: Supplementary file 1 [file 25178896]

## **Supporting Information**

### **Concentration Determination at Countable Molecular Level in Nanofluidics by Solvent-enhanced Photothermal Optical Diffraction**

Yoshiyuki Tsuyama<sup>†</sup> and Kazuma Mawatari<sup>\*,‡</sup>

<sup>†</sup>Department of Bioengineering, Graduate School of Engineering, The University of Tokyo, 7-3-1,  
Hongo, Bunkyo, Tokyo 113-8656, Japan

<sup>‡</sup>Department of Applied Chemistry, Graduate School of Engineering, The University of Tokyo, 7-3-  
1, Hongo, Bunkyo, Tokyo 113-8656, Japan

Email: kmawatari@icl.t.u-tokyo.ac.jp

#### Table of Contents:

1. Experimental Setup (Figure S1)
2. Supporting data for Confirmation of Detection Principle (Figure S2)

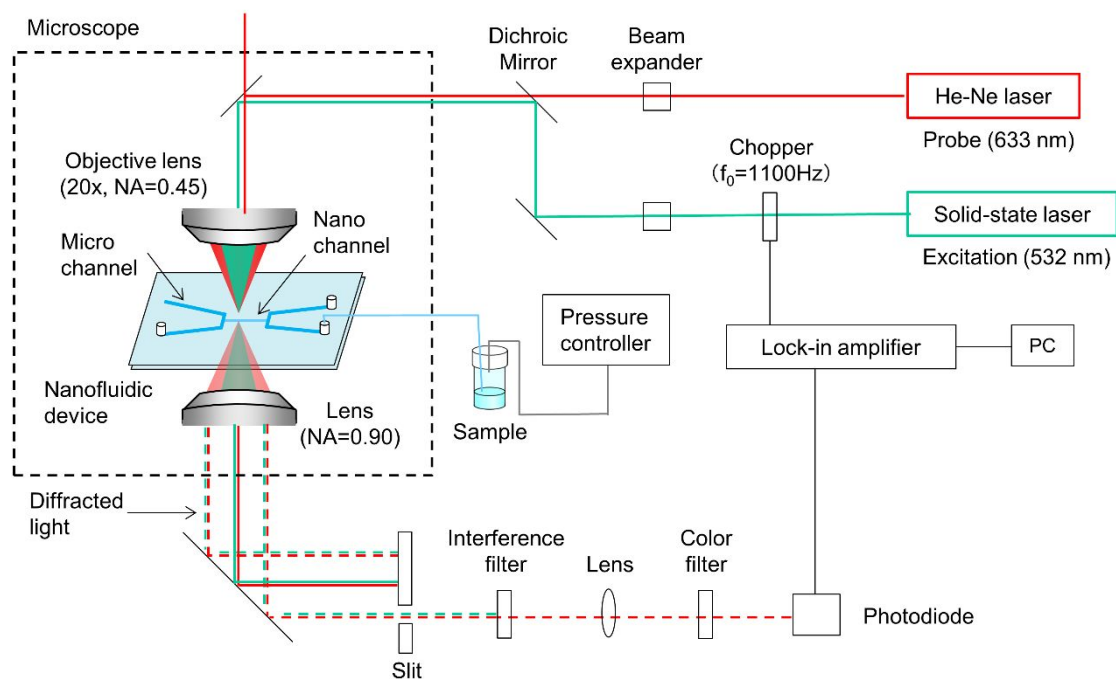

**Figure S1.** Experimental setup for photothermal optical diffraction (POD). Both probe laser and excitation laser are focused on a nanochannel through an objective lens equipped with a microscope. After passing through a nanofluidic device, a diffracted probe laser is selectively detected by slit, filter, and photodiode.

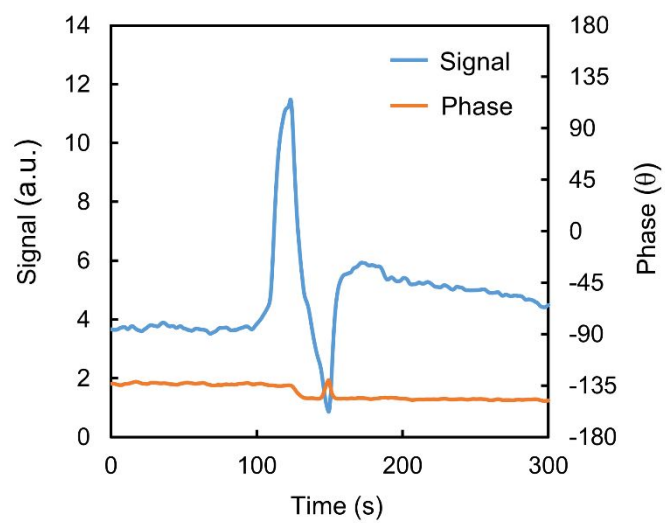

**Figure S2.** Time trace of signal intensity and phase when the solution in the channel was replaced from hexane to acetonitrile. Sudan IV was used as a solute. No phase change was observed before and after replacement.
